# Supplementary material for: Pillar[5]arene-based nonionic polyrotaxanes and a topological gel prepared from cyclic host liquids
Source: Royal Society of Chemistry journal article supplement (doi:10.1039/c4cc02833c), 2014-01-01
Supplement: c4cc02833c1.pdf [file c4cc02833c1.pdf]

## **Electronic Supplementary Information (ESI)**

### **Pillar[5]arene-based Nonionic Polyrotaxanes and a Topological Gel Prepared from Cyclic Host Liquids**

Tomoki Ogoshi\*, Takamichi Aoki, Seita Ueda, Yuko Tamura and Tada-aki Yamagishi

*Graduate School of Natural Science and Technology, Kanazawa University, Kakuma-  
machi, Kanazawa, 920-1192, Japan*

#### **Table of Contents**

|                                                                                               |       |
|-----------------------------------------------------------------------------------------------|-------|
| <b>Experimental section</b>                                                                   | S2-S3 |
| <b>Figs. S1-S3</b> $^1\text{H}$ and $^{13}\text{C}$ NMR spectra                               | S4-S6 |
| <b>Fig. S4</b> $^1\text{H}$ NMR spectrum of a mixture of PTHF and <b>2</b> in $\text{CDCl}_3$ | S7    |
| <b>Fig. S5</b> Determination of conversions to polyrotaxanes <b>5</b>                         | S8    |
| <b>Fig. S6</b> 2D NOESY NMR of polyrotaxane <b>5</b>                                          | S9    |
| <b>Fig. S7</b> 2D NOESY NMR of polyrotaxane <b>6</b>                                          | S10   |
| <b>Fig. S8</b> DSC trace of CHL <b>3</b>                                                      | S11   |
| <b>References</b>                                                                             | S12   |

## **Experimental section**

**Materials.** All solvents and reagents were used as supplied. Pillar[5]arene-based CHL **2**, and stopper **4** were synthesized according to the previous papers.<sup>S1,S2</sup>

**Measurements.** The <sup>1</sup>H NMR spectra were recorded at 500 MHz and <sup>13</sup>C NMR spectra were recorded at 125 MHz with a JEOL-ECA500 spectrometer.

**CHL 3.** *per*-Hydroxylated pillar[5]arene **1**<sup>S3</sup> (0.32 g, 0.52 mmol) was dissolved in DMF (8 mL). Sodium hydride (0.40 g, 10 mmol) was added and the reaction mixture was stirred. Then, excess of 2-allylethyl *p*-toluenesulfonate<sup>S4</sup> (3.4 g, 10 mmol) was added and the reaction mixture was heated at 80 °C for 48 h. The solvent was evaporated to give a liquid. Column chromatography (silica gel; ethyl acetate : methanol = 1 : 2) afforded a yellow liquid (0.10 g, 0.044 mmol, Yield: 8%). <sup>1</sup>H NMR (CDCl<sub>3</sub>, 500 MHz, ppm): δ 6.83 (s, 10H, phenyl), 5.82 (m, 10H, allyl), 5.19 (d, 10H, allyl), 5.11 (d, 10H, allyl), 4.01 (t, 20H, methylene), 3.91 (t, 20H, methylene), 3.82 (t, 20H, methylene), 3.74 (s, 10H, methylene bridge), 3.72 (t, 20H, methylene), 3.63 (t, 20H, methylene), 3.56 (t, 20H, methylene), 3.47 (t, 20H, methylene). <sup>13</sup>C NMR (CDCl<sub>3</sub>, 500 MHz, ppm): δ 149.9, 134.9, 128.7, 117.1, 115.3, 72.2, 70.8, 69.4, 68.1, 29.4. HRESIMS: *m/z* Calcd for C<sub>125</sub>H<sub>200</sub>Na<sub>10</sub>O<sub>40</sub> [M+Na]<sup>+</sup>: 2354.2731, found 2354.2747.

**Polyrotaxane 5.** PTHF<sup>S5</sup> (7.2 mg, 0.10 mmol) and stopper **4** (1.4 mg, 6.5 μmol) were dissolved CHL **2** (2.1 g, 1.0 mmol) with Cu(CH<sub>3</sub>CN)<sub>4</sub>PF<sub>6</sub> (2.4 mg, 6.5 μmol) and tris[(1-benzyl-1H-1,2,3-triazol-4-yl)methyl]amine (TBTA, 3.4 mg, 6.5 μmol). The mixture was stirred for 12 h at 25 °C. The excess CHL **2** was removed by washing with water. To remove the excess stopper **3** and PTHF containing no and small amount of pillar[5]arene wheels, the residue was washed with hexane to give polyrotaxane **5** (14.2 mg, yield 44%). <sup>1</sup>H NMR (CDCl<sub>3</sub>, 500 MHz, ppm): 7.47 (br, 2H, triazole), 7.18 (br, 4H, stopper), 7.11 (br, 2H, stopper), 6.89 (s, phenyl proton of pillar[5]arene wheel), 4.80-4.90 (br, 4H, methylene), 3.28-4.20 (m, protons from methylene and methoxy of pillar[5]arene wheel), 2.9-3.2 (br, methylene protons of PTHF), 1.33 (br, 24H, stopper), 0.90-1.40 (br, methylene protons of PTHF). <sup>13</sup>C NMR (CDCl<sub>3</sub>, 500 MHz, ppm): δ 149.7, 128.7, 114.9, 72.0, 70.8, 70.7, 70.6, 70.3, 67.9, 59.0, 29.4, 26.1.

**Polyrotaxane 6.** PTHF (3.9 mg, 0.054 mmol) and stopper **4** (1.2 mg, 5.3 μmol) were dissolved in CHL **3** (0.10 g, 0.044 mmol) with Cu(CH<sub>3</sub>CN)<sub>4</sub>PF<sub>6</sub> (2.0 mg, 5.3 μmol) and

TBTA (2.8 mg, 5.3  $\mu$ mol). The mixture was stirred for 12 h at 25 °C. The excess CHL **3** was removed by washing with a mixture of water and methanol (water : methanol = 1 : 1). To remove the excess stopper **3** and PTHF containing no and small amount of pillar[5]arene wheels, the residue was washed with hexane to give polyrotaxane **6** (8.2 mg, yield 35%).  $^1\text{H}$  NMR ( $\text{CDCl}_3$ , 500 MHz, ppm): 7.47 (br, 2H, triazole), 7.17 (br, 4H, stopper), 7.10-7.13 (br, 2H, stopper), 6.88 (s, phenyl protons of pillar[5]arene wheel), 5.85-5.93 (m, allyl protons of pillar[5]arene wheel), 5.13-5.30 (m, allyl protons of pillar[5]arene wheel), 4.80-4.90 (br, 4H, methylene), 3.30-3.75 (m, protons from methylene of pillar[5]arene wheel), 2.90-3.30 (br, methylene protons of PTHF), 0.90-1.52 (br, stopper and methylene protons of PTHF).  $^{13}\text{C}$  NMR ( $\text{CDCl}_3$ , 500 MHz, ppm):  $\delta$  149.6, 134.8, 128.6, 117.1, 114.7, 72.2, 70.7, 69.4, 67.8, 29.0, 26.5, 26.2.

**Synthesis of Topological Gel.** Polyrotaxane **6** (8.2 mg) was dissolved in chloroform (0.3 mL). To the mixture, Grubbs first generation catalyst (benzylidene-bis(tricyclohexylphosphine)-dichlororuthenium, 0.80 mg, 0.097  $\mu$ mol) was added. The solution was stirred at 25 °C. After 10 h, gelation took place. To remove Grubbs first generation catalyst, the gel was washed with chloroform and methanol (6.1 mg, yield 75%).

**Measurement of Swelling Degrees.** The topological gel was placed in the following organic solvents including hexane (dielectric constant:  $\epsilon = 1.9$ ), chloroform ( $\epsilon = 4.9$ ), THF ( $\epsilon = 7.6$ ), dichloromethane ( $\epsilon = 9.0$ ), acetone ( $\epsilon = 21$ ) and methanol ( $\epsilon = 32$ ). After immersion for 24 h, we measured  $Q$  of the gels, which is defined by as the following equation:

$$Q = (W_{\text{wet}} - W_{\text{dry}}) / W_{\text{dry}} \text{ (wt/wt)}$$

where  $W_{\text{dry}}$  and  $W_{\text{wet}}$  are the weights of the dried gel and the wet gel, respectively.

## $^1\text{H}$ and $^{13}\text{C}$ NMR spectra of CHL **3**

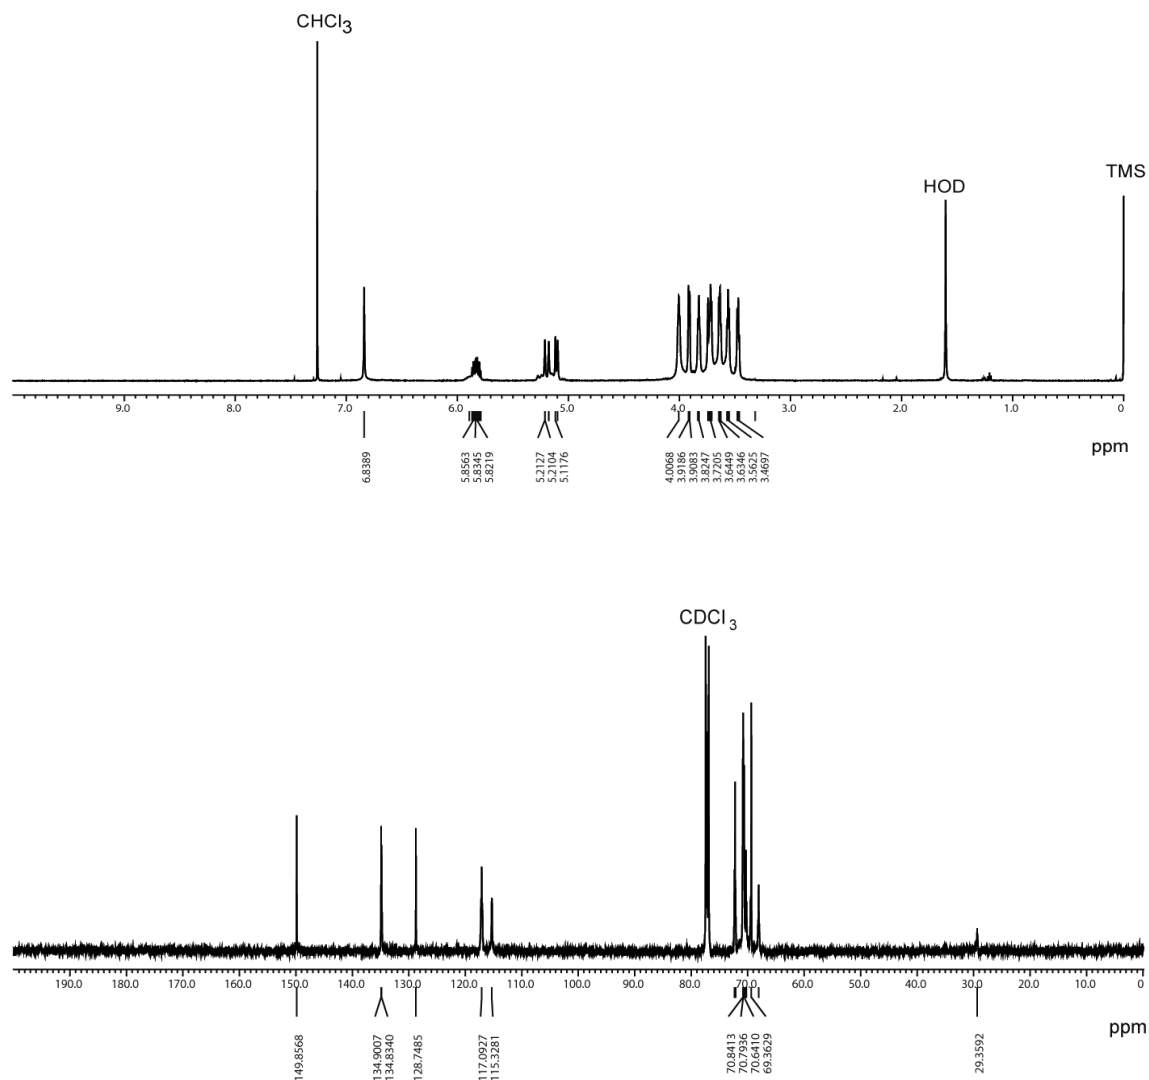

**Fig. S1**  $^1\text{H}$  and  $^{13}\text{C}$  NMR spectra of CHL **3** in  $\text{CDCl}_3$  at 25 °C.

## $^1\text{H}$ and $^{13}\text{C}$ NMR spectra of polyrotaxane **5**

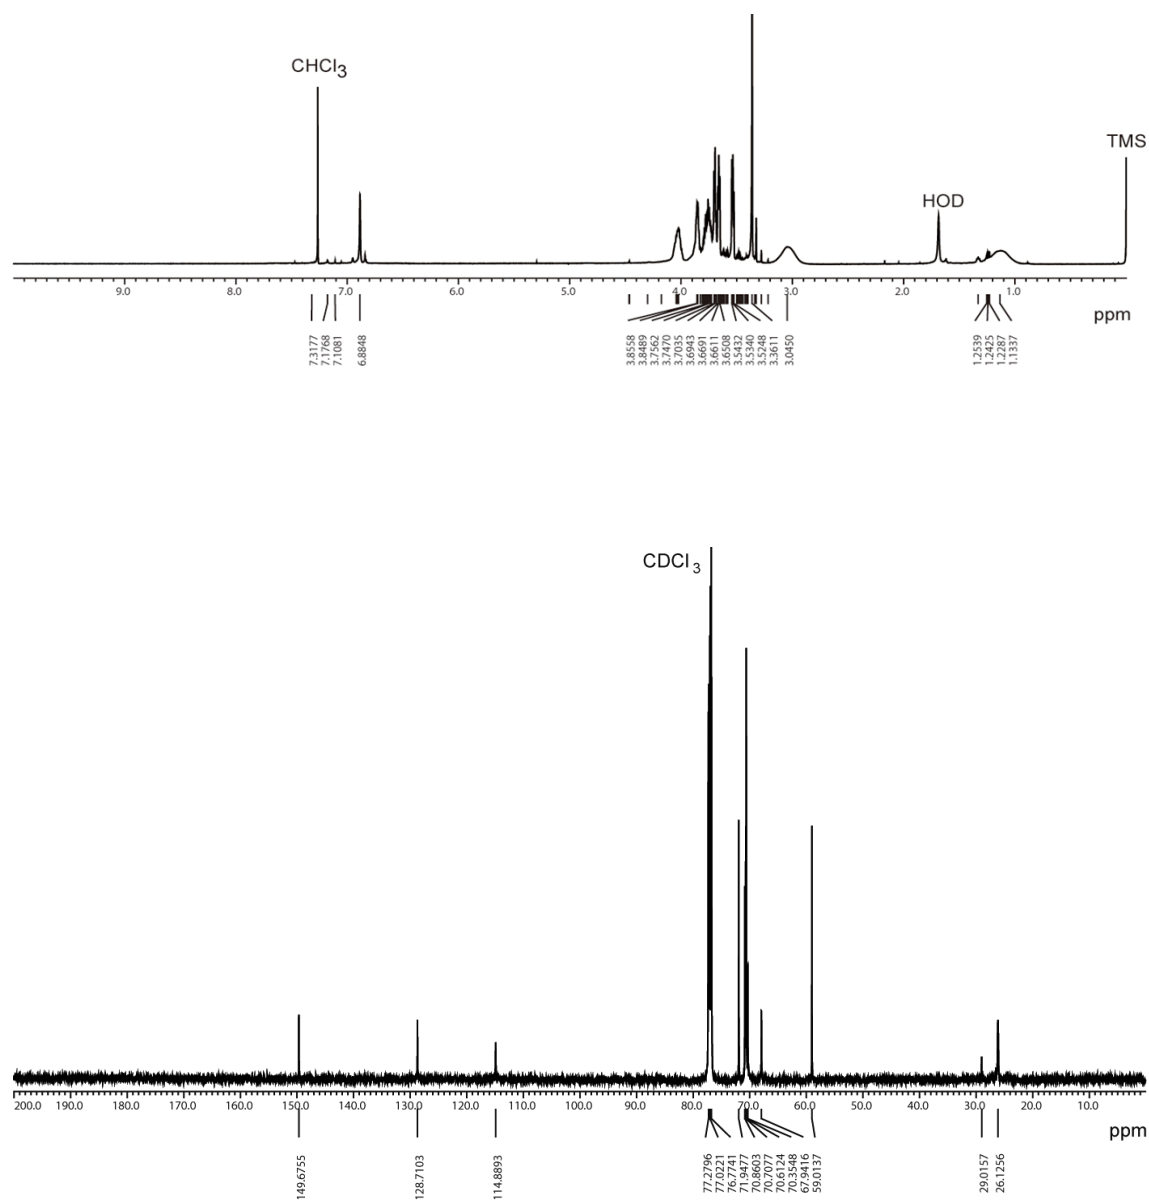

**Fig. S2**  $^1\text{H}$  and  $^{13}\text{C}$  NMR spectra of polyrotaxane **5** in  $\text{CDCl}_3$  at 25 °C.

## $^1\text{H}$ and $^{13}\text{C}$ NMR spectra of polyrotaxane 6

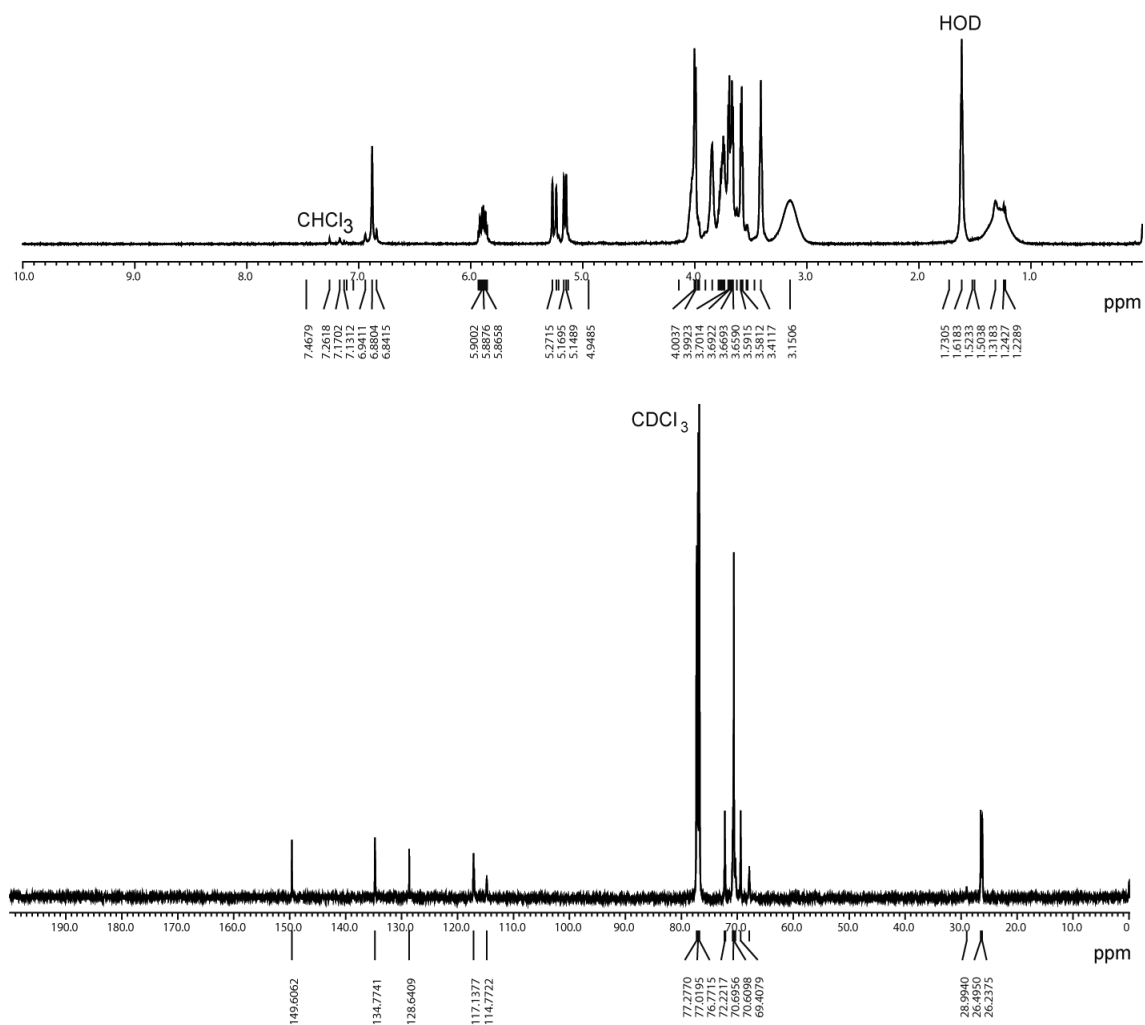

**Fig. S3**  $^1\text{H}$  and  $^{13}\text{C}$  NMR spectra of polyrotaxane 6 in  $\text{CDCl}_3$  at 25 °C.

**$^1\text{H}$  NMR spectrum of a mixture of PTHF and **2** in  $\text{CDCl}_3$**

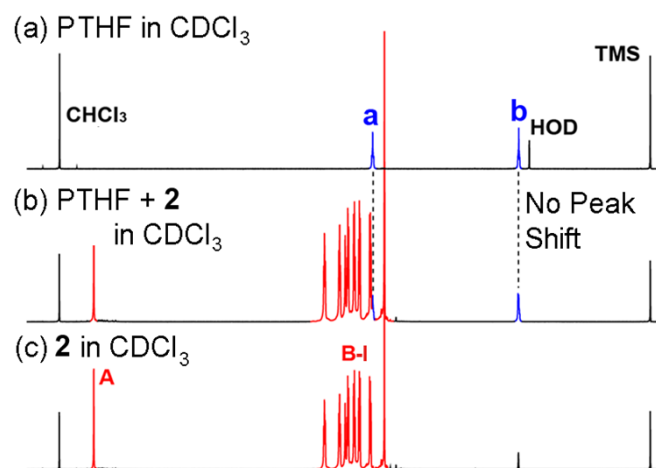

**Fig. S4**  $^1\text{H}$  NMR spectra of (a) PTHF, (b) a mixture of PTHF and **2**, and (c) **2** in 10 mM in  $\text{CDCl}_3$  at 42  $^\circ\text{C}$ .

## Determination of conversions to polyrotaxanes **5**

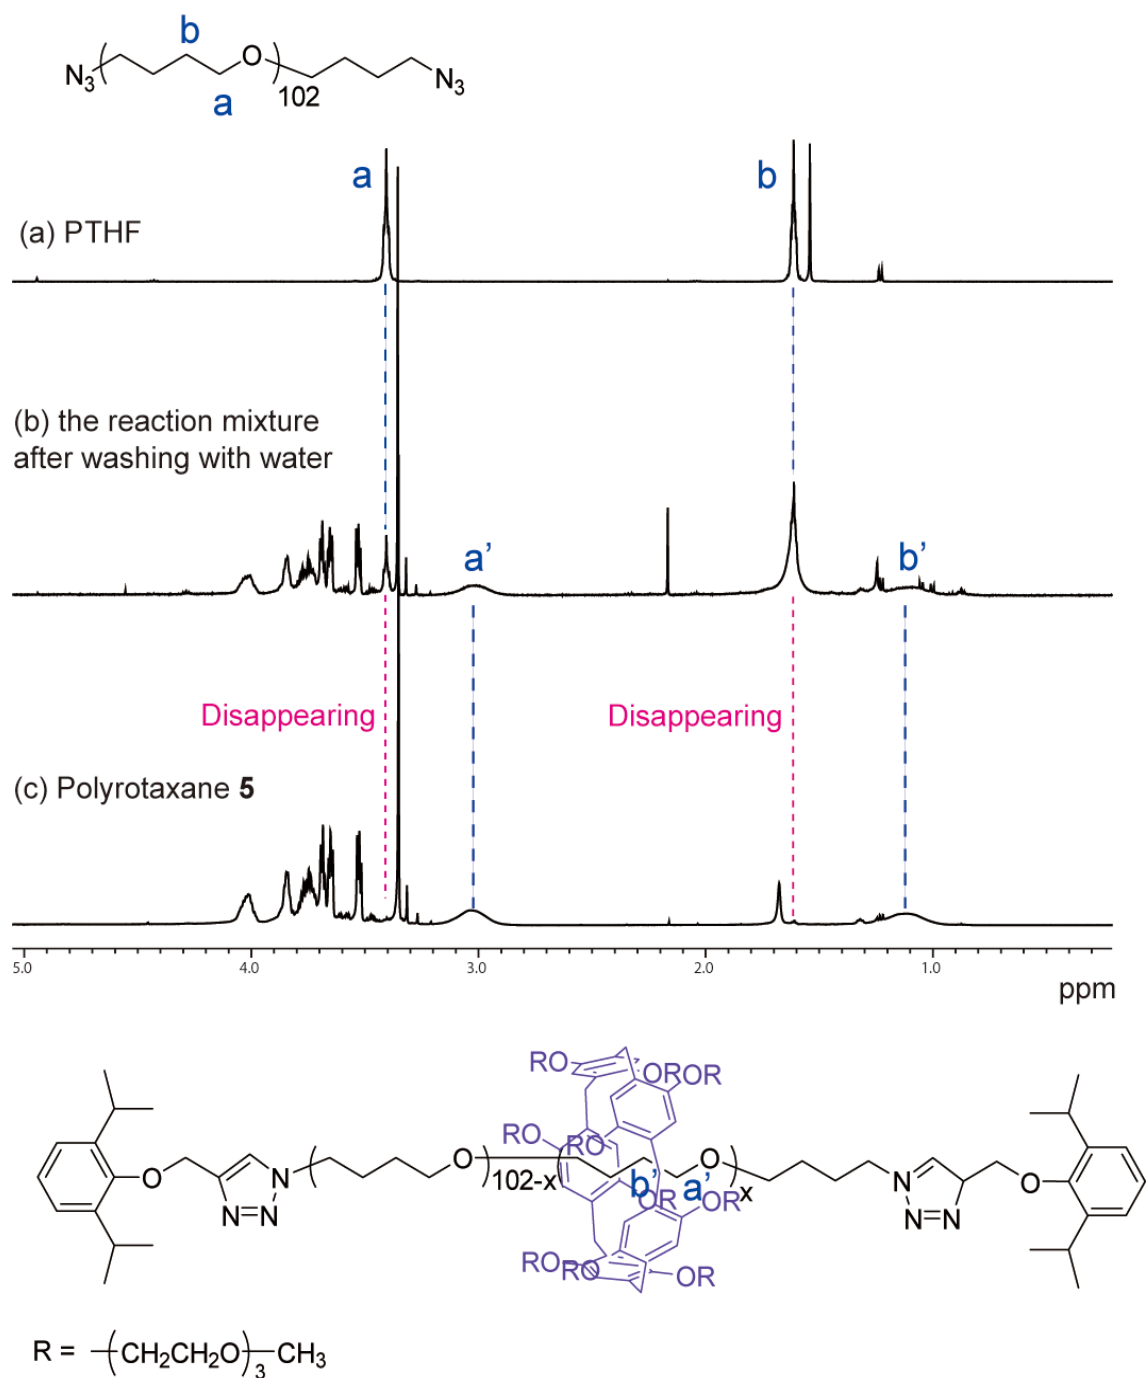

**Fig. S5** Partial  $^1\text{H}$  NMR spectra (25  $^\circ\text{C}$ ,  $\text{CDCl}_3$ ) of (a) PTHF, (b) the reaction mixture for the synthesis of polyrotaxane **5** after washing with water, and (c) polyrotaxane **5**, which was isolated by washing with water and hexane. In Figure S5(b), The new peaks were observed at 1.1 and 3.0 ppm ( $a'$  and  $b'$ ). The new peaks were caused by shielding of the methylene moiety of polyrotaxane **5** by pillar[5]arene wheels. Thus, these peaks are assigned as methylene moiety of PTHF in the polyrotaxane **5**. The proton peaks of the methylene moiety of PTHF containing no wheel pillar[5]arenes **1** were also observed at 1.6 and 3.4 ppm ( $a$  and  $b$ ). Conversions to polyrotaxanes **5** were determined by the integration ratios between these peaks ( $a$  and  $a'$ ).



## 2D NOESY NMR of polyrotaxane **5**

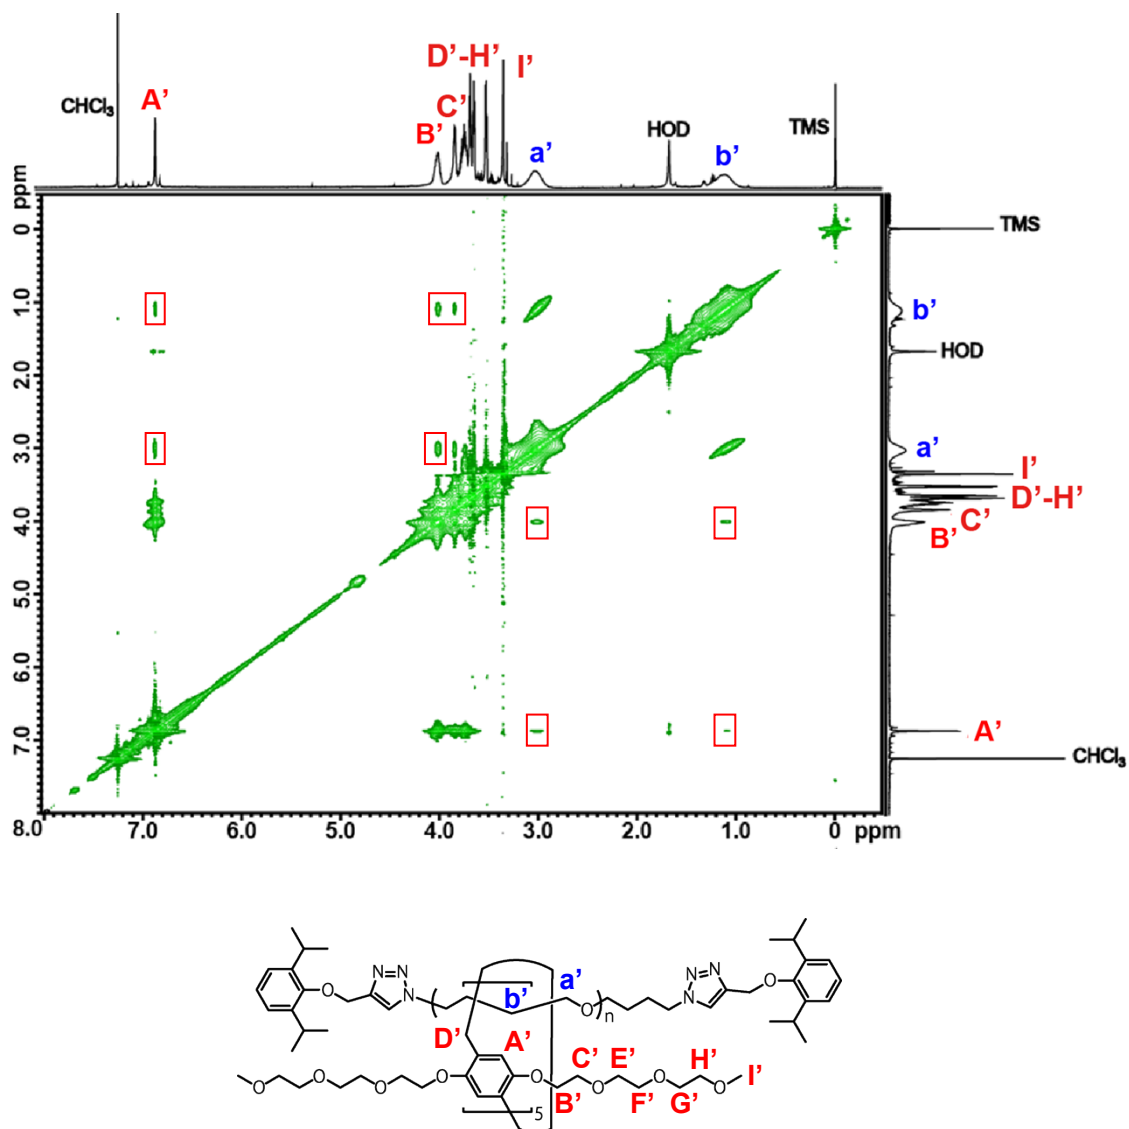

Fig. S6 2D NOESY study of polyrotaxane **5** in CDCl<sub>3</sub>.

## 2D NOESY NMR of polyrotaxane 6

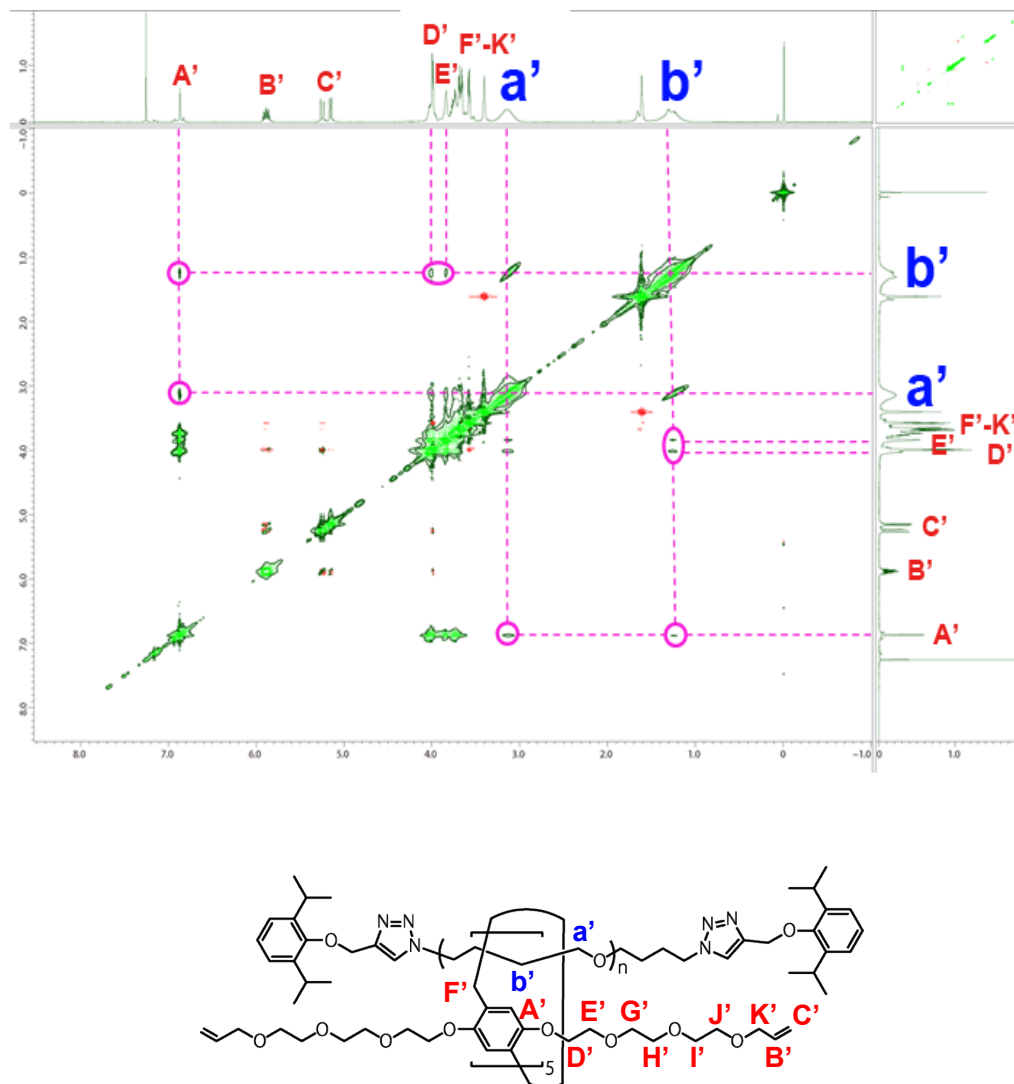

Fig. S7 2D NOESY study of polyrotaxane 6 in CDCl<sub>3</sub>.

DSC trace of CHL 3

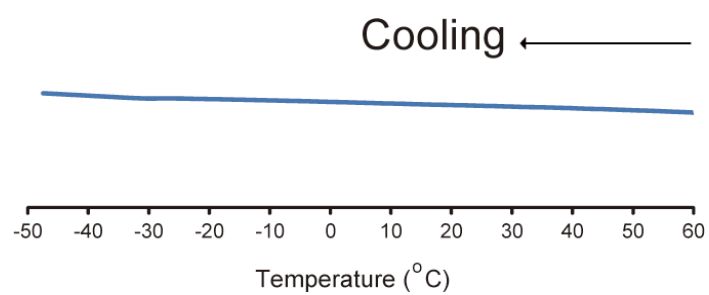

**Fig. S8** DSC trace of CHL 3.

## References

- S1. T. Ogoshi, R. Shiga and T. Yamagishi, *J. Am. Chem. Soc.*, 2012, **134**, 4577.  
S2. W. Zhang, W. R. Dichtel, A. Z. Stieg, D. Benitez, J. K. Gimzewski, J. R. Heath and J. F. Stoddart, *Proc. Natl. Acad. Sci. USA*, 2008, **105**, 6514.  
S3. L. Taifeng, L. Yongjun, Y. Yongli, L. Yuliang, Y. Yanwen, C. Nan, C. Songhua, L. Chao, Z. Yongsheng and L. Huibiao, *J. Phys. Chem. C*, 2012, **116**, 14134.  
S4. T. Ogoshi, S. Kanai, S. Fujinami, T. Yamagishi and Y. Nakamoto, *J. Am. Chem. Soc.*, 2008, **130**, 5022.  
S5. N. Sugai, H. Heguri, K. Ohta, Q. Meng, T. Yamamoto and Y. Tezuka, *J. Am. Chem. Soc.*, 2010, **132**, 14790.
